# Supplementary material
Source: Royal Society of Chemistry journal article supplement (doi:10.1039/d6fo00494f)
Supplement: d6fo00494f3.xlsx [file d6fo00494f3.xlsx]

## Sheet: Proximate Composition
SampleID	Moisture and volatile	Protein	Fat	Fibre	Ash	Carbohydrates	Sugars
Whole commercial walnut	5.71	9.28	23.74	64.26	1.52	1	1
Whole defective walnut	5.34	8.16	24.52	57.25	1.58	3.15	1.26
Walnut kernel	4.4	20.19	63.37	14.42	1.87	1	0.94
Walnut shell	8.62	1.43	1	87.99	1.07	1	0.75
Green walnut	73.94	1.58	0.8	20.03	1.12	2.53	1.14

## Sheet: Fatty Acid Profile
SampleID	Σ SFA	Σ MUFA	Σ PUFA	Σ Omega-3 fatty acids	Σ Omega-6 fatty acids	C(4:0) Butyric acid	C(6:0) Caproic acid	C(8:0) Caprylic acid	C(10:0) Capric acid	C(12:0) Lauric acid	C(12:1) Lauroleic acid	C(14:0) Myristic acid	C(14:1) Myristoleic acid	C(15:0) Pentadecanoic acid	C(15:1) Pentadecenoic acid	C(16:0) Palmitic acid	C(16:1) Palmitoleic acid	C(17:0) Margaric acid	C(17:1) Margaroleic acid	C(18:0) Stearic acid	C(18:1) trans-Oleic acid	C(18:1) cis-Oleic acid	C(18:2) trans-Linoleic acid	C(18:2) cis-Linoleic acid	C(18:3) trans-Linolenic acid	C(18:3) α-Linolenic acid	C(20:0) Arachidic acid	C(20:1) Gadoleic acid	C(20:2) Eicosadienoic acid	C(20:3) Eicosatrienoic acid	C(20:4) Arachidonic acid	C(20:5) Eicosapentaenoic acid	C(21:0) Heneicosanoic acid	C(22:0) Behenic acid	C(22:1) Erucic acid	C(22:5) Docosapentaenoic acid	C(22:6) Docosahexaenoic acid	C(24:0) Lignoceric acid	C(24:1) Nervonic acid
Whole commercial walnut	24.25	27.38	48.37	5.98	42	< 0,01	0.53	0.14	0.02	0.04	< 0,01	0.11	< 0,01	0.04	< 0,01	13.7	1.38	0.15	0.06	4.74	0.1	25.3	0.04	42	< 0,01	5.62	0.27	0.48	0.31	< 0,01	< 0,01	0.27	0.34	0.38	< 0,01	< 0,01	0.09	3.79	0.06
Whole defective walnut	14.76	17.69	67.55	11.73	55.63	< 0,01	0.1	0.03	0.01	0.05	< 0,01	0.08	< 0,01	0.03	< 0,01	9.24	0.48	0.1	0.14	3.46	0.07	16.71	0.11	55.63	< 0,01	11.52	0.19	0.26	0.09	< 0,01	< 0,01	0.11	0.1	0.19	< 0,01	< 0,01	0.1	1.18	0.03
Walnut kernel	15.06	17.32	67.63	10.74	56.7	< 0,01	0.08	0.03	< 0,01	0.02	< 0,01	0.04	< 0,01	0.03	< 0,01	9	0.38	0.08	0.04	3.76	0.04	16.58	0.1	56.67	< 0,01	10.5	0.2	0.26	0.09	< 0,01	< 0,01	0.19	0.08	0.17	< 0,01	< 0,01	0.05	1.56	< 0,01
Walnut shell	17.01	56.24	26.75	3.35	22.74	< 0,01	< 0,01	< 0,01	< 0,01	< 0,01	< 0,01	0.33	< 0,01	< 0,01	< 0,01	10.6	0.33	0.23	< 0,01	4.42	0.6	54.9	0.17	22.7	< 0,01	3.35	0.43	0.44	0.22	< 0,01	< 0,01	< 0,01	0.24	0.48	< 0,01	< 0,01	< 0,01	0.29	< 0,01
Green walnut	16.29	12.59	71.12	11	59.94	< 0,01	< 0,01	< 0,01	< 0,01	0.32	< 0,01	0.4	< 0,01	< 0,01	< 0,01	10.83	1.13	0.16	< 0,01	3.5	0.58	10.53	0.18	59.94	< 0,01	11	0.28	0.36	< 0,01	< 0,01	< 0,01	< 0,01	< 0,01	0.47	< 0,01	< 0,01	< 0,01	0.38	< 0,01

## Sheet: Antioxidants
SampleID	Lutein	δ -Tocopherol	γ -Tocopherol	β-Carotene	α-Carotene	Epicatechin	Catechin	Chlorogenic	Ellagic acid	Hesperidin	Naringenin	Gallic acid
Green walnut	4.4757	34.5715	48.7656	584.185	159.054	5.2	16.8	2.2	136	0.1	0.1	63.2
Green walnut	4.60292	36.9599	51.8887	651.014	173.11	5.6	16.2	1.8	120	0.1	0.1	68.4
Green walnut	4.67227	38.1594	52.91	653.912	176.022	5.4	16.6	1.6	82	0.1	0.1	63.2
Whole commercial walnut	3.28674	33.6763	180.756	11.6313	1	1.4	55.8	1	560	0.4	2.2	48
Whole commercial walnut	3.3007	33.5736	198.4	12.1572	1	1.6	55.8	1.2	588	0.2	2.2	47.2
Whole commercial walnut	3.30422	33.3881	201.525	12.1185	1	1.2	54.8	1.2	594	0.4	2	47.2
Whole defective walnut	2.44674	33.7324	138.214	14.0806	1	0.6	51	1.2	466	0.1	2.2	60.4
Whole defective walnut	2.71754	35.9983	156.608	14.1431	1	0.8	51.2	0.6	480	0.2	2.2	54.2
Whole defective walnut	2.92128	36.2727	157.592	13.8568	1	0.8	50.6	0.8	502	0.3	2	54.6
Walnut shell	3.08644	21.553	26.0841	13.9667	9.80442	2	71.2	2.4	708	0.1	1.4	57.4
Walnut shell	3.48302	21.5699	25.3168	13.2241	7.31085	1.8	71.2	1.8	710	0.1	1.2	57.2
Walnut shell	3.37907	21.5997	25.7963	12.5772	9.28799	3	73.2	1.8	722	0.1	1.2	56.8
Walnut kernel	1.79207	43.4238	228.887	14.7212	1	0.6	26.6	0	628	0.1	0.2	26.6
Walnut kernel	1.58383	44.3011	217.958	13.7635	1	0.2	26.6	0	614	0.2	0.2	26.6
Walnut kernel	2.24088	43.7579	233.859	12.3565	1	0.4	26.2	0	630	0.3	0.2	25.6

## Sheet: MRM_Conditions
Source distance: 11			Q1 Mass (Da)	Q3 Mass (Da)	Compound	RT	DP (volts)	EP (volts)	CE (volts)	CXP (volts)
NEB: 10			301.1	145	Ellagic acid	3.44	-110	-10	-54	-7
CUR: 25			301.1	284.1	Ellagic acid	3.44	-110	-10	-44	-15
CAD: Medium			301.1	228.9	Ellagic acid	3.44	-110	-10	-40	-13
Ionization mode: negative			353.084	190.9	Chlorogenic acid	2.63	-80	-10	-24	-11
XP: -15			353.084	96.9	Chlorogenic acid	2.63	-80	-10	-46	-5
IS: -4500			353.084	79.9	Chlorogenic acid	2.63	-80	-10	-114	-11
TEM: 500			168.946	125	Gallic acid	1.8	-65	-10	-22	-7
Source TºC: 350ºC			168.946	79	Gallic acid	1.8	-65	-10	-34	-1
Ion Source Gas 1 (GS1): 60			168.946	81.1	Gallic acid	1.8	-65	-10	-26	-1
Ion Source Gas 1 (GS2): 50			300.925	150.8	Quercetin	4.22	-105	-10	-32	-9
Auxiliary gas flow: 6000cm3/min			300.925	107	Quercetin	4.22	-105	-10	-40	-5
			300.925	65	Quercetin	4.22	-105	-10	-64	-9
			271.031	150.9	Naringerin	4.4	-90	-10	-26	-9
			271.031	119.1	Naringerin	4.4	-90	-10	-36	-7
			271.031	64.9	Naringerin	4.4	-90	-10	-58	-9
			609.242	301	Hesperidina	3.65	-105	-10	-38	-15
			609.242	164.1	Hesperidina	3.65	-105	-10	-76	-11
			609.242	285.9	Hesperidina	3.65	-105	-10	-60	-7
			288996	245.1	(-)Epicathecquin	2.93	-90	-10	-22	-5
			288996	123.1	(-)Epicathecquin	2.93	-90	-10	-44	-9
			288996	109	(-)Epicathecquin	2.93	-90	-10	-30	-3
			288996	244.9	Cathequin	2.69	-90	-10	-22	-13
			288996	108.9	Cathequin	2.69	-90	-10	-38	-5
			288996	123	Cathequin	2.69	-90	-10	-44	-5
